# Supplementary material
Source: PubMed Central journal article supplement (PMC2854228)

## Supporting Information

### **Polymeric Micelles with Ionic Cores Containing Biodegradable Cross-Links for Delivery of Chemotherapeutic Agents**

Jong Oh Kim,<sup>1</sup> Gaurav Sahay,<sup>1</sup> Alexander V. Kabanov,<sup>1,2</sup> and Tatiana K. Bronich<sup>1\*</sup>

<sup>1</sup> *Department of Pharmaceutical Sciences and Center for Drug Delivery and Nanomedicine, College of Pharmacy, University of Nebraska Medical Center, 985830 Nebraska Medical Center, Omaha, Nebraska 68198-5830 and* <sup>2</sup> *Department of Chemistry, M.V. Lomonosov Moscow State University, Leninskie Gory, V-234, Moscow, 119992, Russia.*

#### **Methods**

##### *Fourier-transform infrared (FT-IR) analysis*

The FT-IR spectra of freeze-dried PEO-*b*-PMA, *cl*-micelles/ED and *cl*-micelles/Cys were measured by using a NICOLET IR200 FT-IR spectrometer (Thermo Fisher Scientific Co.). Infrared spectra were analyzed using OMNI software.

#### **Legends:**

**Figure S1.** The typical <sup>1</sup>H NMR spectra of (A) DOX, (B) DOX-labeled PEO-*b*-PMA and (C) PEO-*b*-PMA copolymer in D<sub>2</sub>O.

**Figure S2.** The typical <sup>1</sup>H NMR spectra of (A) *cl*-micelles/ED and (B) *cl*-micelles/Cys micelles at pH 10 in D<sub>2</sub>O. Targeted degree of cross-linking is 0%, 20%, 30%, 40% and 60% from bottom to top.

**Figure S3.** IR spectra of (A) PEO-*b*-PMA block copolymer, (B) *cl*-micelles/ED and (C) *cl*-micelles/Cys.

**Figure S4.** Tapping-mode AFM images (**A, B**) and TEM images (**C, D**) of *cl*-micelles/ED (**A, C**) and *cl*-micelles/Cys (**B, D**). *cl*-micelles were deposited on APS mica from aqueous solutions at pH 7 and dried on the mica. Targeted degree of cross-linking is 20%. Scan size of AFM images (**A, B**) is 2  $\mu\text{m}$ . Bar in TEM images (**C, D**) equals 100 nm.

**Figure S5.** Tapping-mode AFM images (**A, B**) and TEM images (**C, D**) of DOX-loaded *cl*-micelles/ED (**A, C**) and DOX-loaded *cl*-micelles/Cys (**B, D**). Targeted degree of cross-linking is 20%. Scan size of AFM images (**A, B**) is 2  $\mu\text{m}$ . Bar in TEM images (**C, D**) equals 100 nm.

**Figure S6.** In vitro degradation of (**A**) *cl*-micelles/Cys and (**B**) *cl*-micelles/ED in the presence of DTT in PBS buffer (0.14 M NaCl, pH 7.4). ( $\circ$ ) without DTT as control, ( $\Delta$ ) DTT 0.1 mM, ( $\blacktriangle$ ) DTT 0.5 mM, ( $\square$ ) DTT 5.0 mM, ( $\blacksquare$ ) DTT 25 mM. Targeted degree of cross-linking of both *cl*-micelles is 70%.

**Figure S7.** In vitro cytotoxic effect of DOX-loaded *cl*-micelles in A2780 ovarian carcinoma cells. ( $\blacksquare$ ) free DOX, ( $\square$ ) DOX-loaded *cl*-micelles/Cys after incubation with DTT 25 mM for 24hr at 37°C, ( $\square$ ) DOX-loaded *cl*-micelles/Cys and ( $\blacktriangle$ ) DOX-loaded *cl*-micelles/ED; n=8.

**Figure S1**

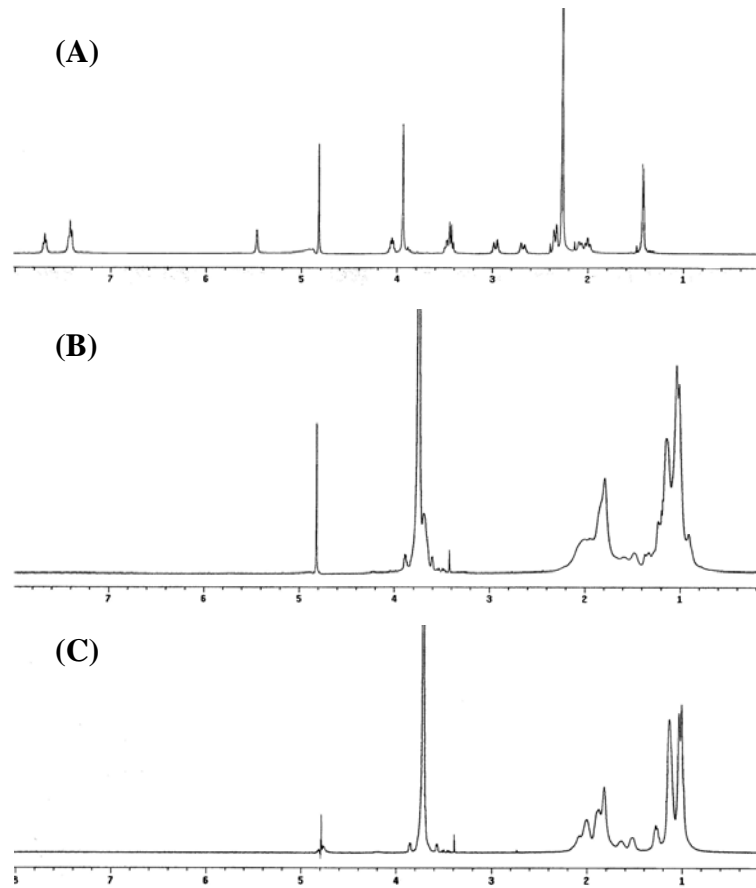

**Figure S2**

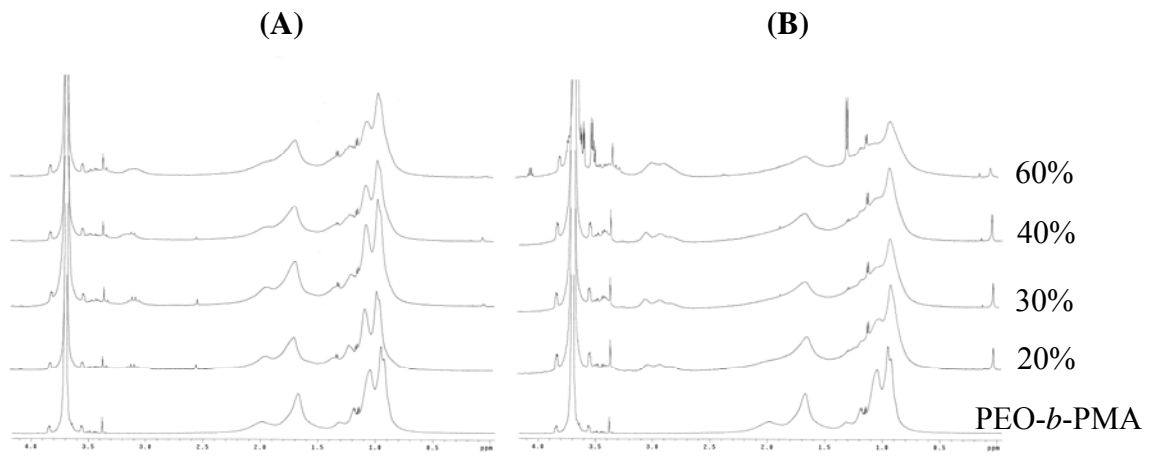

**Figure S3**

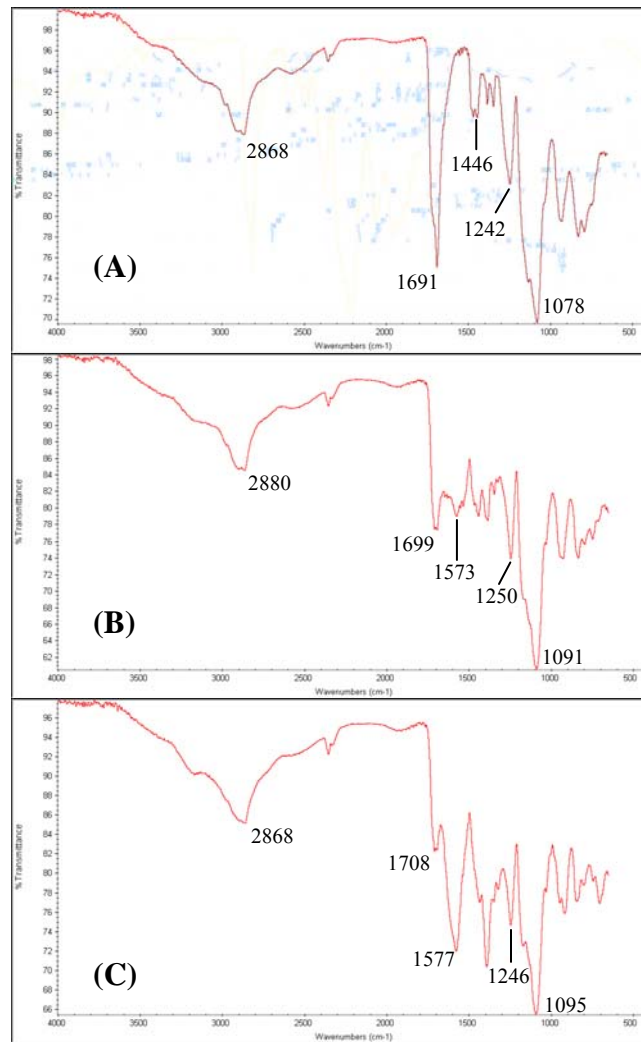

**Figure S4**

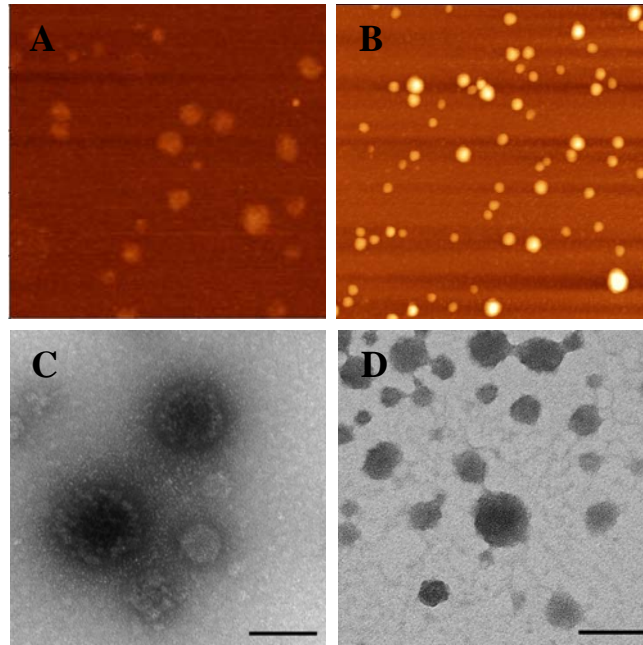

**Figure S5**

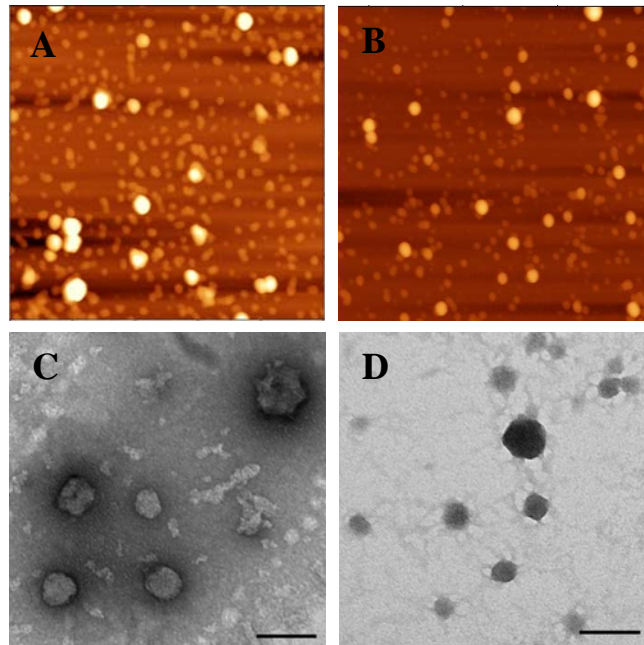

**Figure S6**

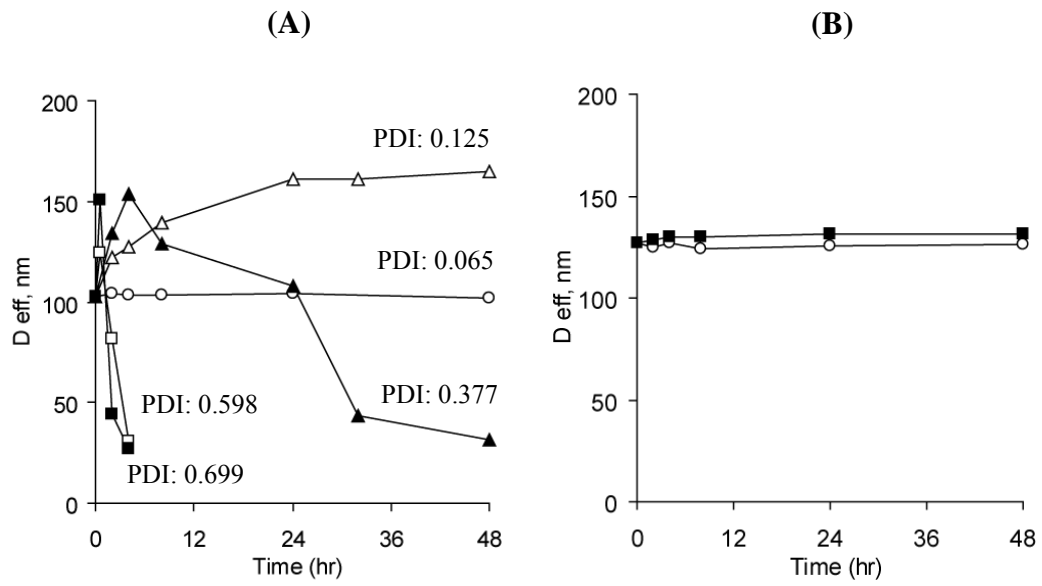



**Figure S7**

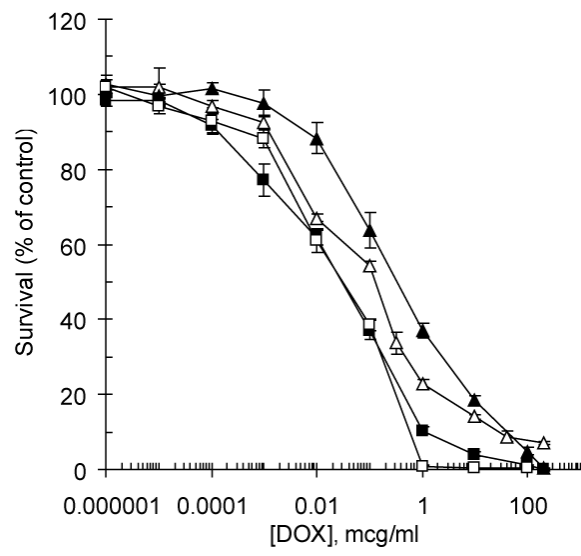

Supplement: NIHMS190947-supplement-1_si_001.pdf [file NIHMS190947-supplement-1_si_001.pdf]
